# Supplementary material for: Insight into interactions among P, Zn and ZSM-5 during bi-component modification on ZSM-5
Source: Royal Society of Chemistry journal article supplement (doi:10.1039/d0nj04136j), 2020-01-01
Supplement: d0nj04136j1.pdf [file d0nj04136j1.pdf]

**Supporting Information for**  
**Insight into interactions among P, Zn and ZSM-5 during bi-**  
**component modification on ZSM-5**

Mudi Xin, Enhui Xing, Ying Ouyang, Xiuzhi Gao, Guangtong Xu, Yibin

Luo\*, and Xingtian Shu

State Key Laboratory of Catalytic Materials and Reaction Engineering, Research

Institute of Petroleum Processing, Sinopec, Beijing 100083, China

\*Corresponding author: Prof. Yibin Luo

Address: Research Institute of Petroleum Processing Sinopec, Xueyuan Road 18,  
Beijing, China.

Tel: +86 010-82368237

E-mail: [luoyibin.ripp@sinopec.com](mailto:luoyibin.ripp@sinopec.com) (Y. B. Luo)

## **Table of Contents**

Figure S1. XRD patterns and the relative crystallinity of Zn/P/ZSM-5 prepared via different modification sequences (a) before and (b) after hydrothermal treatment.

Figure S2 N<sub>2</sub> adsorption and desorption isotherms at 77 K of Zn/P/ZSM-5 prepared via different modification sequences (a) before and (b) after hydrothermal treatment.

Figure S3. <sup>29</sup>Si MAS NMR spectra of Zn/P/ZSM-5 prepared via different modification sequences (a) before and (b) after hydrothermal treatment.

Figure S4. NH<sub>3</sub>-TPD spectra of Zn/P/ZSM-5 prepared via different modification sequences after hydrothermal treatment.

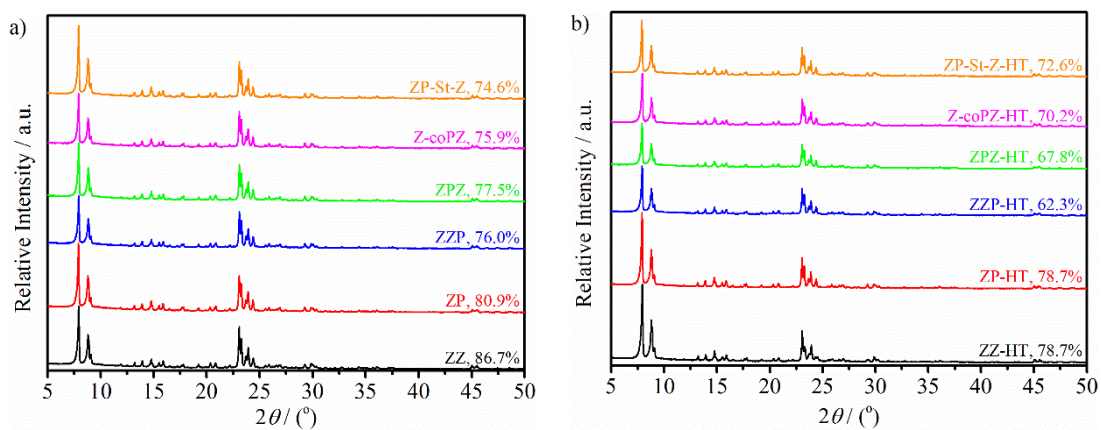

**Figure S1** XRD patterns and the relative crystallinity of Zn/P/ZSM-5 prepared via different modification sequences (a) before and (b) after hydrothermal treatment.

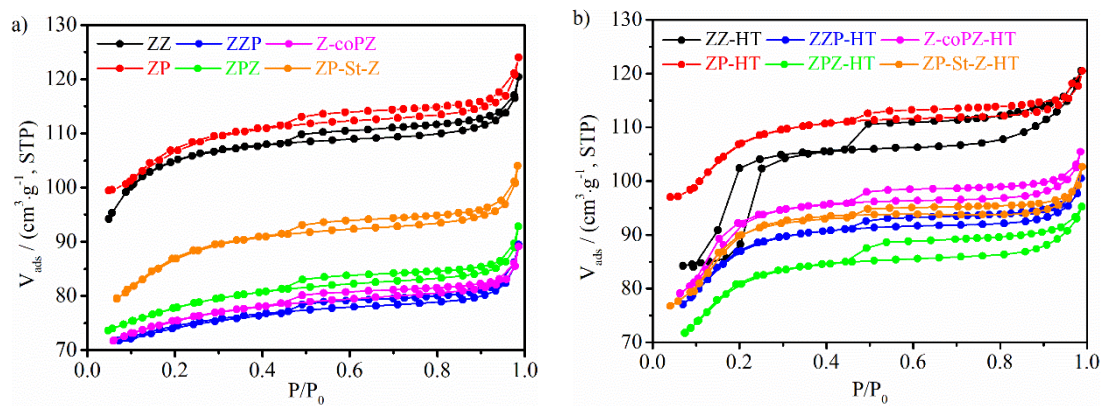

**Figure S2** N<sub>2</sub> adsorption and desorption isotherms at 77 K of Zn/P/ZSM-5 prepared via different modification sequences (a) before and (b) after hydrothermal treatment.

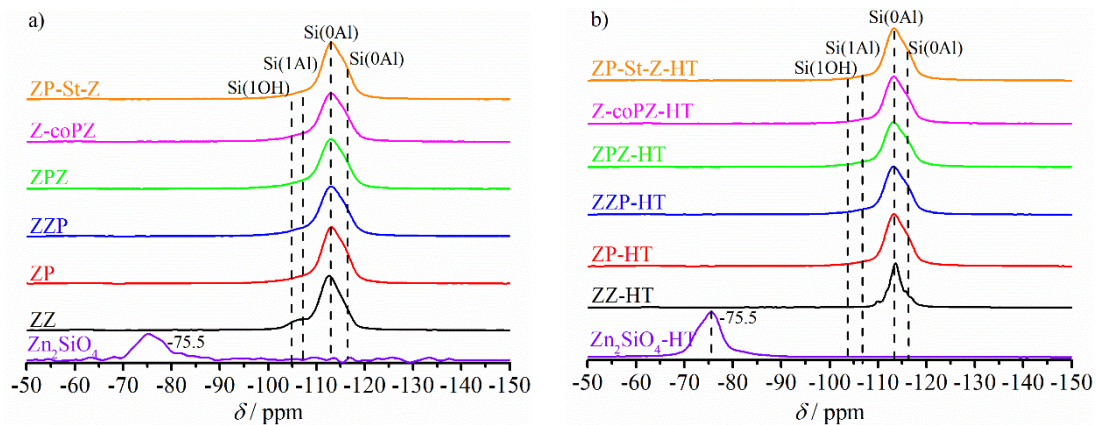

**Figure S3**  $^{29}\text{Si}$  MAS NMR spectra of Zn/P/ZSM-5 prepared via different modification sequences (a) before and (b) after hydrothermal treatment.

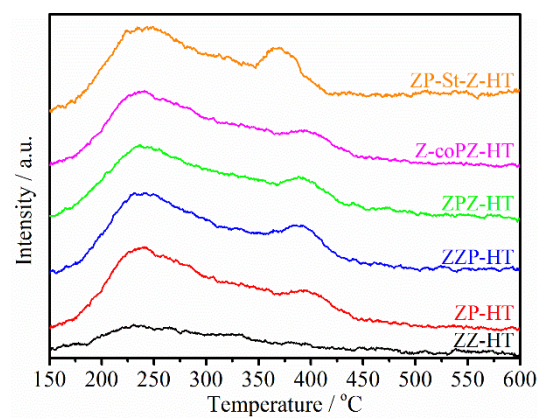

**Figure S4** NH<sub>3</sub>-TPD spectra of Zn/P/ZSM-5 prepared via different modification sequences after hydrothermal treatment.
